# Supplementary material
Source: MDPI journal article supplement (https://www.mdpi.com/2073-4344/12/11/1426)
Supplement: s1 [file s1]

## Supplementary Material

### Enhanced catalytic performance and sulfur resistance of reduced graphene oxide-promoted MnO<sub>2</sub> nanorods-supported Pt nanoparticles for benzene oxidation

Dan Zhang <sup>1</sup>, Qing Ye <sup>1,\*</sup>, Ning Dong <sup>1,2</sup>, Wenjin Wang <sup>1</sup>, Yang Xiao <sup>1</sup>, Hongxing Dai <sup>3,\*</sup>

<sup>1</sup> Key Laboratory of Beijing on Regional Air Pollution Control, Department of Environmental Science, Faculty of Environment and Life, Beijing University of Technology, Beijing 100124, China

<sup>2</sup> Beijing Huaneng Yangtze Environmental Technology Research Institute Co., Ltd.

<sup>3</sup> Beijing Key Laboratory for Green Catalysis and Separation, Key Laboratory of Beijing on Regional Air Pollution Control, Key Laboratory of Advanced Functional Materials, Education Ministry of China, and Laboratory of Catalysis Chemistry and Nanoscience, Department of Chemical Engineering, Faculty of Environment and Life, Beijing University of Technology, Beijing 100124, China

\* Corresponding authors:

Prof. Qing Ye (E-mail address: [yeqing@bjut.edu.cn](mailto:yeqing@bjut.edu.cn))

Tel. No.: +8610-6739-1659; Fax: +8610-6739-1983

Prof. Hongxing Dai (E-mail address: [hxdai@bjut.edu.cn](mailto:hxdai@bjut.edu.cn))

Tel. No.: +8610-6739-6118; Fax: +8610-6739-1983

### **Catalyst characterization procedures:**

The actual Pt contents in the  $x\text{Pt-yrGO}/\alpha\text{-MnO}_2$  samples were determined using the ICP–AES technique on a Thermo Electron IRIS Intrepid ER/S spectrometer (Thermo Elemental, America). The samples were dissolved in a mixture of concentrated HCl (37 wt%) and  $\text{HNO}_3$  (75 wt%) aqueous solutions with a volumetric ratio of 3.0 : 1.0 prior to Pt content analyses. X-ray diffraction (XRD) patterns of the samples were determined on a Bruker D8-Advance diffractometer (Bruker/AXS, Germany) in the  $2\theta$  range of  $10^\circ$ – $80^\circ$  with Cu  $K\alpha$  radiation ( $\lambda = 0.15406$  nm), in which the operating voltage and current were 50 kV and 30 mA, respectively. Fourier transform infrared (FTIR) spectra of the samples in the range of  $400$ – $4000$   $\text{cm}^{-1}$  were recorded on a Thermo Scientific Nicolet 6700 FTIR spectrometer (Thermo Fisher Scientific, USA) with a resolution of  $4$   $\text{cm}^{-1}$ . Brunauer–Emmett–Teller (BET, BK 200C, Beijing JWGB Corporation, China) surface areas and pore-size distributions of the samples were obtained via the nitrogen adsorption at the liquid  $\text{N}_2$  temperature using the BET equation and the Barrett–Joyner–Halenda (BJH) method, respectively. Morphologies of the samples were directly observed on a Hitachi S-4300 scanning electron microscope (SEM, Hitachi Corporation, Japan). High angle annular dark field (HAADF) images and element mapping were acquired on the equipment FEI G2 80-200/Chemi-STEM Cs-corrected transmission electron microscopy (TEM) (JEOL-2010, JEOL Corporation, Japan) with probe corrector. Thermogravimetric (TG, STA 449 F5, NETZSCH Scientific Instruments Trading, Germany) tests were carried out on a microcomputer-differential thermal balance of Beijing Hengjiu Scientific Instrument Factory. Each sample was dried at  $120$   $^\circ\text{C}$  for 2 h and kept at  $25$   $^\circ\text{C}$  for 50 min in a  $\text{N}_2$  flow of 60 mL/min, the heating rate was  $10$   $^\circ\text{C}/\text{min}$ , and the test

temperature range was 25–300 °C. X-ray photoelectron spectroscopy (XPS, ESCALAB 250 Xi spectrometer, Thermo Fisher Scientific, USA) was used to determine the binding energies (BEs) of Mn 2p, Pt 4f, O 1s, and C 1s of surface species using monochromatic Al K $\alpha$  X-ray source ( $h\nu = 1486.6$  eV). The C 1s signal at 284.6 eV was taken as a reference for BE calibration.

H<sub>2</sub> temperature-programmed reduction (H<sub>2</sub>-TPR) of the samples was performed on a Builder PCA-1200 analyzer (JW-BK132, Beijing JWGB Corporation, China). Prior to the H<sub>2</sub>-TPR experiment, 100 mg of the sample was pretreated in a 5 vol% O<sub>2</sub>/N<sub>2</sub> (balance) flow of 30 mL/min at 400 °C for 1 h, then cooled to room temperature, and finally reduced in a 5 vol% H<sub>2</sub>/N<sub>2</sub> (balance) flow of 30 mL/min at a ramp of 10 °C/min from room temperature to 900 °C. The reduction peaks were calibrated against the data of a standard powdered CuO reduction. Oxygen temperature-programmed desorption (O<sub>2</sub>-TPD) of the samples was conducted on a Builder PCA-1200 analyzer (JW-BK132, Beijing JWGB Corporation, China). A total of 100 mg of the sample was pretreated at 400 °C and saturated with O<sub>2</sub> (10 vol% O<sub>2</sub>/He (balance), 30 mL/min) at 50 °C. After being purged in pure He of 30 mL/min at 50 °C for 1 h, O<sub>2</sub> desorption took place in He flow of 30 mL/min at a ramp of 8 °C min<sup>-1</sup> from 30 to 900 °C.

The in situ diffuse reflectance infrared Fourier transform spectroscopic (DRIFTS) experiments were conducted on a Bruker TENSOR II spectrometer (Bruker Optics, Germany) characterized by a reaction chamber that could withstand high temperatures (Harrick Praying Mantis). The catalyst sample was packed into the sample cup of the reaction chamber and heated to 400 °C at a total N<sub>2</sub> flow of 50 mL/min for 1 h to eliminate the influence of surface

impurities ( $\text{H}_2\text{O}$ ,  $\text{CO}_2$ , and etc.), then the catalyst exposed to 1000 ppm benzene +  $\text{N}_2$  (balance) + 20 vol%  $\text{O}_2$  at different temperatures for 60 min, each spectrum had a resolution of  $4\text{ cm}^{-1}$  with 32 accumulated scans.

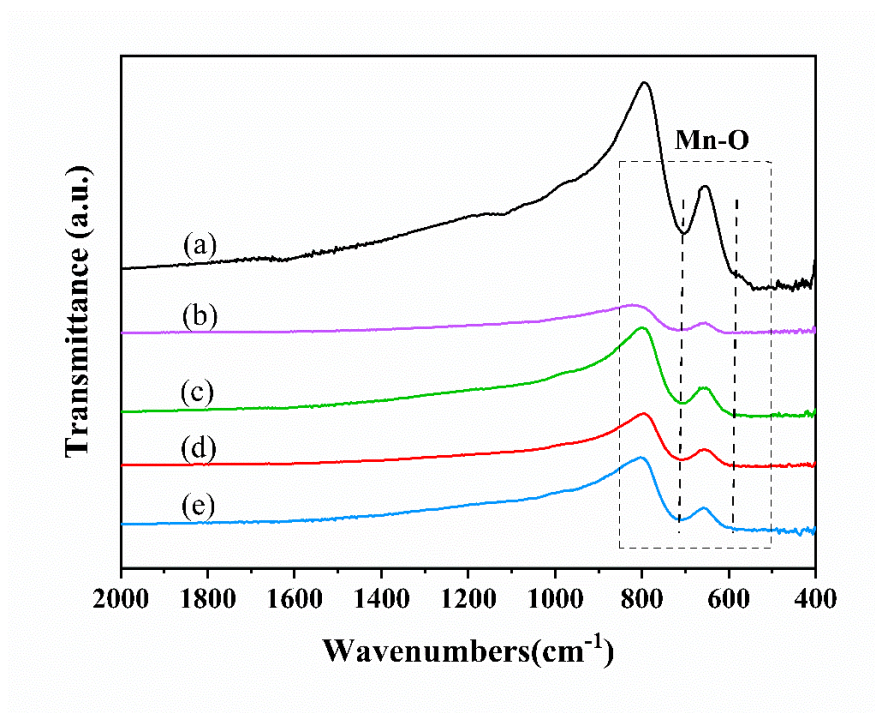

**Figure S1.** FTIR spectra of (a)  $\alpha\text{-MnO}_2$ , (b)  $0.93\text{Pt}/\alpha\text{-MnO}_2$ , (c)  $0.91\text{Pt}-0.5\text{rGO}/\alpha\text{-MnO}_2$ , (d)  $0.94\text{Pt}-1.0\text{rGO}/\alpha\text{-MnO}_2$ , and (e)  $0.92\text{Pt}-2.0\text{rGO}/\alpha\text{-MnO}_2$ .

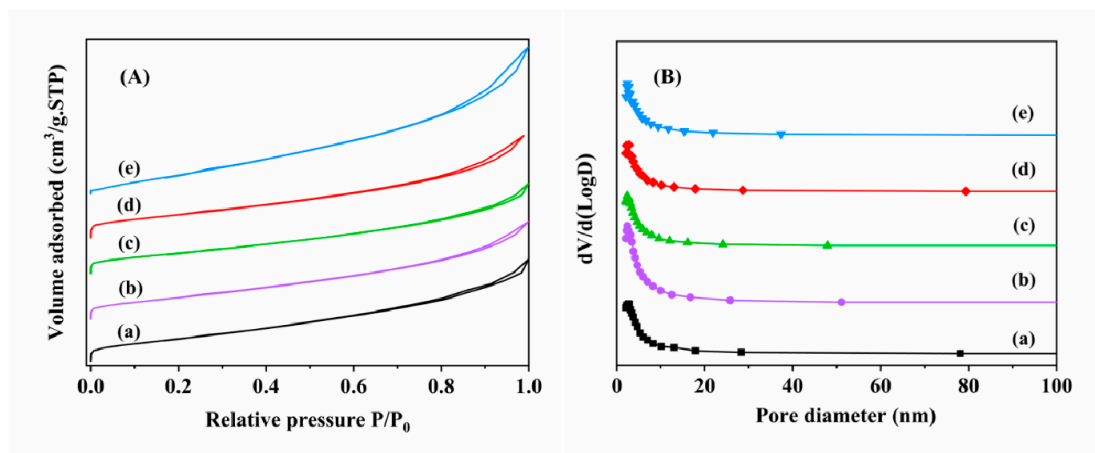

**Figure S2.** (A) Nitrogen adsorption–desorption isotherms and (B) pore-size distributions of (a)  $\alpha$ -MnO<sub>2</sub>, (b) 0.93Pt/ $\alpha$ -MnO<sub>2</sub>, (c) 0.91Pt-0.5rGO/ $\alpha$ -MnO<sub>2</sub>, (d) 0.94Pt-1.0rGO/ $\alpha$ -MnO<sub>2</sub>, and (e) 0.92Pt-2.0rGO/ $\alpha$ -MnO<sub>2</sub>.

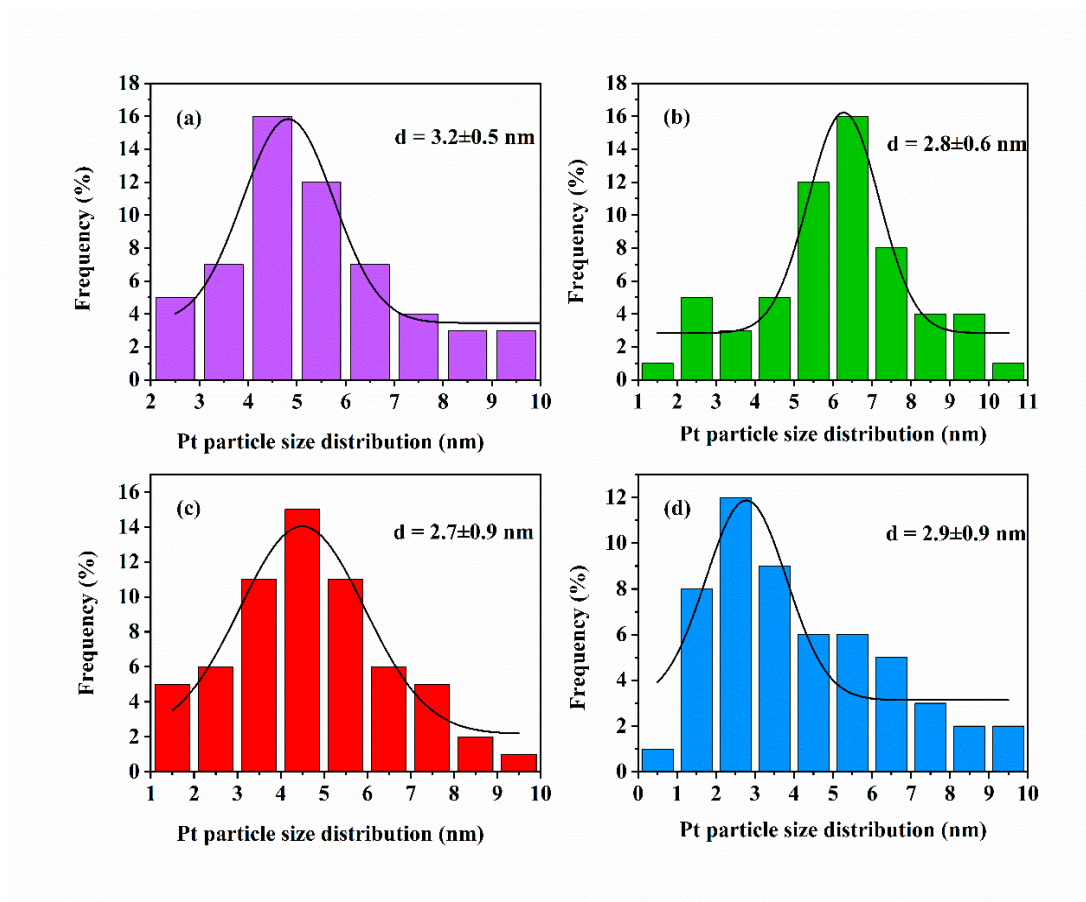

**Figure S3.** Noble particle-size distributions of (a) 0.93Pt/ $\alpha$ -MnO<sub>2</sub>, (b) 0.91Pt-0.5rGO/ $\alpha$ -MnO<sub>2</sub>, (c) 0.94Pt-1.0rGO/ $\alpha$ -MnO<sub>2</sub>, and (d) 0.92Pt-2.0rGO/ $\alpha$ -MnO<sub>2</sub>.

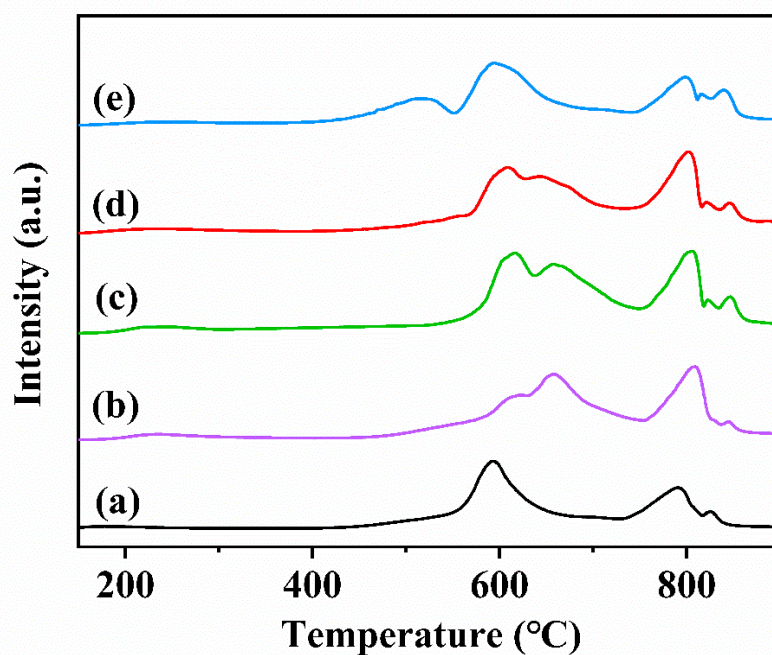

**Figure S4.** O<sub>2</sub>-TPD profiles of (a)  $\alpha$ -MnO<sub>2</sub>, (b) 0.93Pt/ $\alpha$ -MnO<sub>2</sub>, (c) 0.91Pt-0.5rGO/ $\alpha$ -MnO<sub>2</sub>, (d) 0.94Pt-1.0rGO/ $\alpha$ -MnO<sub>2</sub>, and (e) 0.92Pt-2.0rGO/ $\alpha$ -MnO<sub>2</sub>.

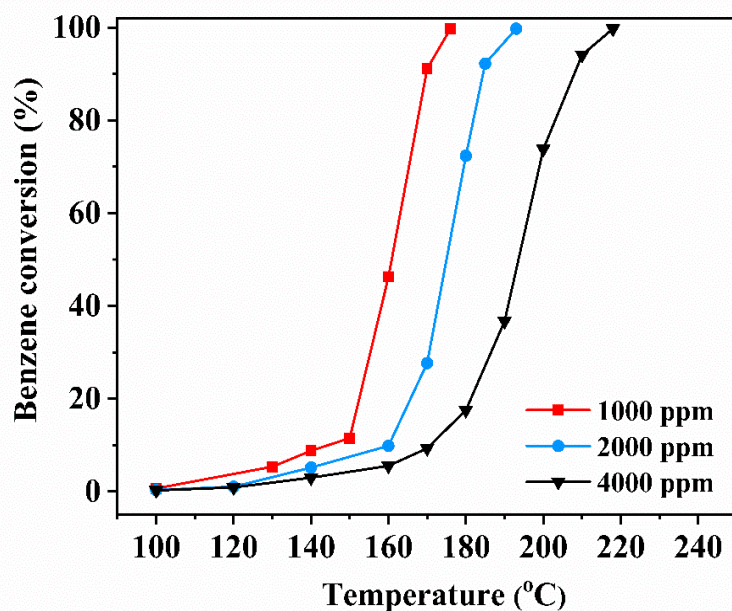

**Figure S5.** Effect of benzene concentration on catalytic activity of 0.94Pt-1.0rGO/ $\alpha$ -MnO<sub>2</sub> at GHSV = 60,000 mL/(g h).

**Table S1.** Comparison on specific reaction rates ( $r_{\text{cat}}$ ) for benzene oxidation at 160 °C over the catalysts studied in the present work and reported in the literature.

| Catalyst                                             | Reactant concentration | GHSV<br>(mL/(g h)) | $r_{\text{cat}}$<br>(mol/(g <sub>Pt</sub> s)) | Ref.       |
|------------------------------------------------------|------------------------|--------------------|-----------------------------------------------|------------|
| 0.94Pt-1.0rGO/ $\alpha$ -MnO <sub>2</sub>            | 1000 ppm benzene       | 60,000             | $3.14 \times 10^{-4}$                         | This study |
| Pt/TMS                                               | 400 ppm benzene        | 60,000             | $8.18 \times 10^{-5}$                         | [13]       |
| Pt/TS-1                                              | 120 ppm benzene        | 60,000             | $7.77 \times 10^{-5}$                         | [14]       |
| Pt/eggshell                                          | 1000 ppm benzene       | 80,000             | $1.55 \times 10^{-5}$                         | [15]       |
| Pt/OMS-2                                             | 1000 ppm benzene       | 20,000             | $9.27 \times 10^{-5}$                         | [16]       |
| Pt <sub>1</sub> /meso-Fe <sub>2</sub> O <sub>3</sub> | 1000 ppm benzene       | 20,000             | $2.32 \times 10^{-5}$                         | [17]       |

**Table S2.** Average Pt particle sizes and actual Pt loadings of the as-obtained samples determined by the ICP–AES technique.

| Sample                                    | Average particle size of Pt (nm) | Actual Pt content (wt%) |
|-------------------------------------------|----------------------------------|-------------------------|
| $\alpha$ -MnO <sub>2</sub>                | –                                | –                       |
| 0.93Pt/ $\alpha$ -MnO <sub>2</sub>        | $3.2 \pm 0.5$                    | 0.93                    |
| 0.91Pt-0.5rGO/ $\alpha$ -MnO <sub>2</sub> | $2.8 \pm 0.6$                    | 0.91                    |
| 0.94Pt-1.0rGO/ $\alpha$ -MnO <sub>2</sub> | $2.7 \pm 0.9$                    | 0.94                    |
| 0.92Pt-2.0rGO/ $\alpha$ -MnO <sub>2</sub> | $2.9 \pm 0.9$                    | 0.92                    |
